# Supplementary figures and images for: Across-province standardization and comparative analysis of time-to-care intervals for cancer
Source: Springer Nature journal article supplement (doi:10.1186/1471-2407-7-186), 2007-10-04

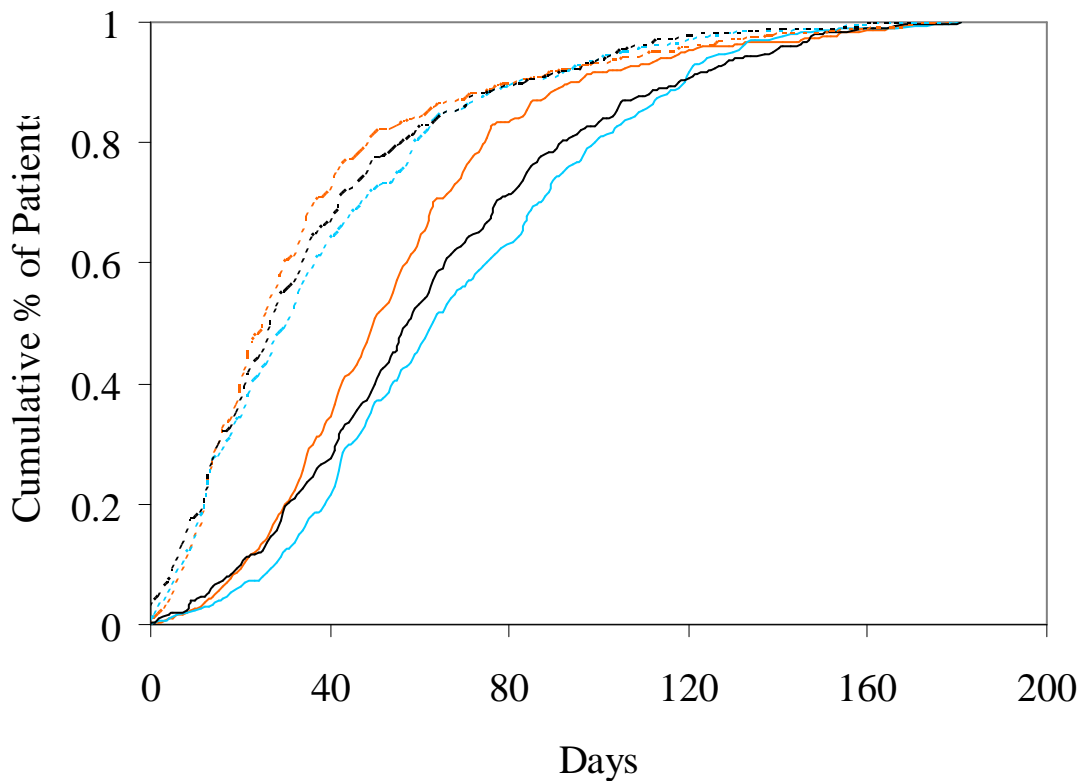

— AB Colorectal    — SK Colorectal    — MB Colorectal  
- - - AB Lung    - - - SK Lung    - - - MB Lung

Supplement: 12885_2007_836_MOESM2_ESM.pdf [file 12885_2007_836_MOESM2_ESM.pdf]
